# Supplementary material for: L-Ferritin targets breast cancer stem cells and delivers therapeutic and imaging agents
Source: PubMed Central journal article supplement (PMC5341832; doi:10.18632/oncotarget.10920), 2016-07-29
Supplement: oncotarget-07-66713-s001.pdf [file oncotarget-07-66713-s001.pdf]

## L-Ferritin targets breast cancer stem cells and delivers therapeutic and imaging agents

### SUPPLEMENTARY MATERIALS AND METHODS

#### FACS analysis of CSC in tumors

Female BALB/c mice (Charles River Laboratories) were s.c. challenged with  $1 \times 10^4$  tumorsphere-derived cells (TUBO) or with  $1 \times 10^5$  TUBO cells, and tumor growth was monitored twice a week with a caliper. When tumors reached 10 mm mean diameter, mice were euthanized and tumors were explanted, finely minced with scissors and then digested by incubation with 1 mg/ml collagenase IV (Sigma Aldrich) in RPMI-1640 (Life Technologies) at 37°C for 1 hour in an orbital shaker. After washing in PBS supplemented with 2% FBS (Sigma-Aldrich), the cell suspension was incubated in an erylise buffer (155mM  $\text{NH}_4\text{Cl}$ , 15.8mM  $\text{Na}_2\text{CO}_3$ , 1mM EDTA, pH 7.3) for 10 minutes at room temperature. After washing

in RPMI-1640 supplemented with 10% FBS, the cell suspension was passed through a 40  $\mu\text{m}$  pore cell strainer, centrifuged at 1400 rpm for 10 minutes, treated with Fc receptor blocker (anti-CD16/CD32, BD Biosciences) and stained with PE-conjugated anti-CD44 and PE-Cy7-conjugated anti-CD24 antibodies (Biolegend) or with the Aldefluor kit (Stem Cell Technologies) according to the manufacturer's instructions. All samples were analyzed using a CyAn ADP Flow Cytometer and the Summit 4.3 software (Beckman Coulter).

#### Histopathological assesment

Liver fragments of  $0.5 \times 0.3 \times 0.2$  cm were fixed overnight in 4 % buffered formaldehyde solution at 4°C and processed by standard methods. Some 5  $\mu\text{m}$  dewaxed sections stained with hematoxylin and eosin were used to evaluate the degree of damage.

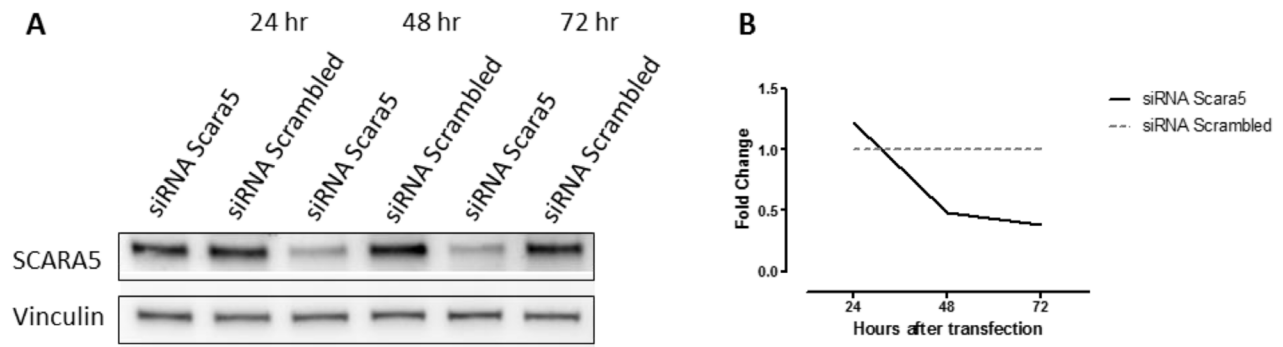

**Supplementary Figure S1: Kinetics of SCARA5 silencing in tumorspheres.** **A.** Immunoblot showing SCARA5 expression in TUBO-derived tumorspheres harvested 24, 48 or 72 hours after transfection with a siRNA specific for SCARA5 or with a negative control Scrambled siRNA. Vinculin expression was used as internal control. **B.** Graph showing fold-change values of SCARA5 protein expression in cells transfected with siRNA to SCARA5 versus cells transfected with Scrambled siRNA, normalized on vinculin levels.

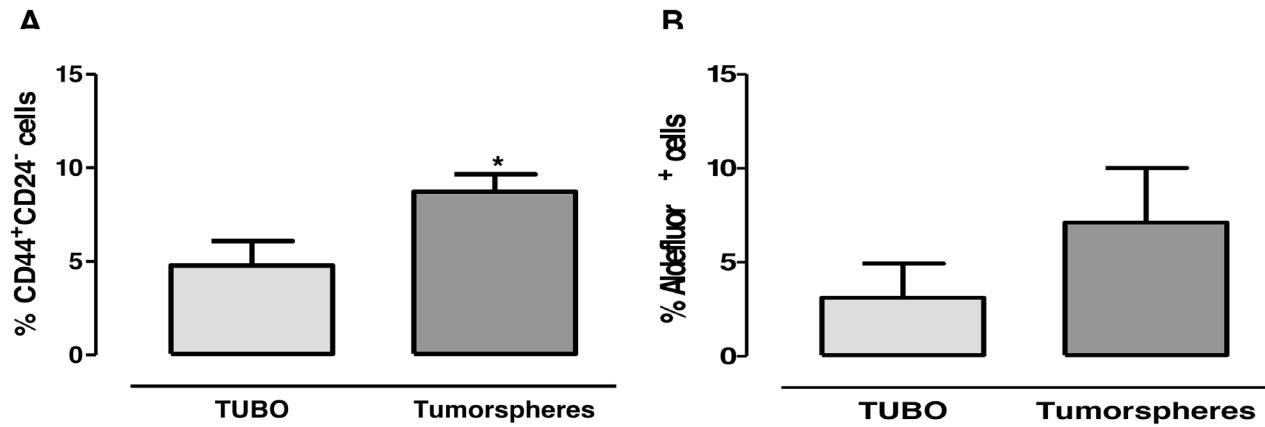

**Supplementary Figure S2: Tumorsphere-induced tumors maintain a higher CSC percentage than TUBO tumors *in vivo*.** FACS analysis of A. CD44<sup>+</sup>CD24<sup>+</sup> and B. Aldefluor<sup>+</sup> CSC in 10 mm mean diameter tumors generated by s.c. injection of 10<sup>5</sup> TUBO or 10<sup>4</sup> tumorsphere-derived cells in BALB/c mice. The graphs show the mean ± SEM of CD44<sup>+</sup>CD24<sup>+</sup> or Aldefluor<sup>+</sup> cells from 7 tumors per group. \*, P < 0.05, Student's t test.

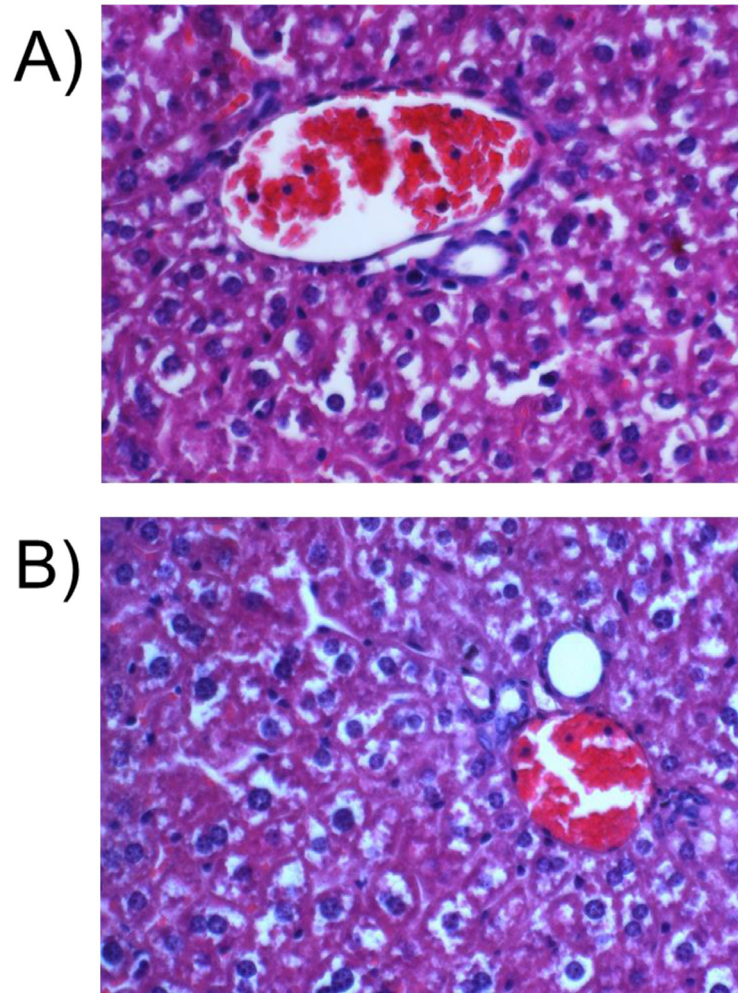

**Supplementary Figure S3: APO-Curcumin treatment does not cause liver damage.** Representative histological liver pictures from APO-curcumin **A.** and Apoferritin **B.** treated mice. 5 $\mu$ m tissue slices were stained with hematoxylin and eosin.

Supplementary Table S1: T<sub>2</sub> weighted MRI image Signal Intensities (S.I.)

|          | <i>S.I.</i><br>TUBO<br>differentiated | <i>S.I.</i><br>TUBO<br>tumorspheres | <i>S.I.</i><br>MDA-MB-231<br>differentiated | <i>S.I.</i><br>MDA-MB-231<br>tumorspheres |
|----------|---------------------------------------|-------------------------------------|---------------------------------------------|-------------------------------------------|
| CTRL     | 2.38x10 <sup>5</sup> ±0.20            | 2.39x10 <sup>5</sup> ±0.25          | 2.27x10 <sup>5</sup> ±0.19                  | 2.21x10 <sup>5</sup> ±0.063               |
| Ferritin | 2.38x10 <sup>5</sup> ±0.17            | 0.186x10 <sup>5</sup> ±0.051        | 1.72x10 <sup>5</sup> ±0.059                 | 0.21x10 <sup>5</sup> ±0.070               |

Signal Intensity (S.I.) measured on T<sub>2</sub>-weighted MRI images of TUBO and MDA-MB-231 cells (differentiated and tumorspheres) reported in Figure 2C.

**Supplementary Table S2: Longitudinal Relaxation Rates ( $R_{1obs}$ ,  $s^{-1}$ ) measured at 7T**

|        | $R_{1obs}$ ( $s^{-1}$ )<br>TUBO<br>differentiated | $R_{1obs}$ ( $s^{-1}$ )<br>TUBO<br>tumorspheres | $R_{1obs}$ ( $s^{-1}$ )<br>MDA-MB-231<br>differentiated | $R_{1obs}$ ( $s^{-1}$ )<br>MDA-MB-231<br>tumorspheres |
|--------|---------------------------------------------------|-------------------------------------------------|---------------------------------------------------------|-------------------------------------------------------|
| CTRL   | 0.436±0.015                                       | 0.449±0.006                                     | 0.384±0.017                                             | 0.429±0.030                                           |
| Apo-Gd | 0.52±0.0068                                       | 0.597±0.008                                     | 0.483±0.015                                             | 0.717±0.020                                           |

Longitudinal Relaxation Rates ( $s^{-1}$ ) measured on  $T_1$ -weighted MRI images of TUBO and MDA-MB-231 cells (differentiated and tumorspheres) reported in Figure 2C.
